# Supplementary material
Source: ML conference proceedings conference paper supplement (https://proceedings.neurips.cc/paper_files/paper/2017/hash/4a2ddf148c5a9c42151a529e8cbdcc06-Abstract.html)
Supplement: Supplementary file [file 4a2ddf148c5a9c42151a529e8cbdcc06-Supplemental.zip]

## A Proof for Section 2

Throughout our proof, we presume without loss of generality that the elements in  $\bar{\mathbf{x}} = (\bar{x}_1, \bar{x}_2, \dots, \bar{x}_d)$  are in descending order by their magnitude, i.e.,  $|\bar{x}_1| \geq |\bar{x}_2| \geq \dots \geq |\bar{x}_s|$  and  $\bar{x}_i = 0$  for  $s < i \leq d$ . We also write  $[n] := \{1, 2, \dots, n\}$  for brevity.

Recall that the partial hard thresholding algorithm with freedom parameter  $r$  proceeds as follows at the  $t$ -th iteration:

$$\begin{aligned} \mathbf{z}^t &= \mathbf{x}^{t-1} - \eta \nabla F(\mathbf{x}^{t-1}) \\ J^t &= S^{t-1} \cup \text{supp}(\nabla F(\mathbf{x}^{t-1}), r) \\ \mathbf{y}^t &= \text{HT}_k(\mathbf{z}_{J^t}^t) \\ S^t &= \text{supp}(\mathbf{y}^t) \\ \mathbf{x}^t &= \arg \min_{\text{supp}(\mathbf{x}) \subset S^t} F(\mathbf{x}) \end{aligned}$$

We first prove the results that appear in Section 3.

**Lemma 8** (Restatement of Lemma 5). *Assume that  $F(\mathbf{x})$  is  $\rho_{2k}^-$ -RSC and  $\rho_{2k}^+$ -RSS. Consider the PHT( $r$ ) algorithm with  $\eta < 1/\rho_{2k}^+$ . Further assume that the sequence of  $\{\mathbf{x}^t\}_{t \geq 0}$  satisfies*

$$\begin{aligned} \|\mathbf{x}^t - \bar{\mathbf{x}}\| &\leq \alpha \cdot \beta^t \|\mathbf{x}^0 - \bar{\mathbf{x}}\| + \psi_1, \\ \|\mathbf{x}^t - \bar{\mathbf{x}}\| &\leq \gamma \|\bar{\mathbf{x}}_{\overline{S}^t}\| + \psi_2, \end{aligned}$$

for positive  $\alpha, \psi_1, \gamma, \psi_2$  and  $0 < \beta < 1$ . Suppose that at the  $n$ -th iteration ( $n \geq 0$ ),  $S^n$  contains the indices of top  $p$  (in magnitude) elements of  $\bar{\mathbf{x}}$ . Then, for any integer  $1 \leq q \leq s - p$ , there exists an integer  $\Delta \geq 1$  determined by

$$\sqrt{2} |\bar{x}_{p+q}| > \alpha \gamma \cdot \beta^{\Delta-1} \|\bar{\mathbf{x}}_{\{p+1, \dots, s\}}\| + \Psi$$

where

$$\Psi = \alpha \psi_2 + \psi_1 + \frac{1}{\rho_{2k}^-} \|\nabla_2 F(\bar{\mathbf{x}})\|,$$

such that  $S^{n+\Delta}$  contains the indices of top  $p+q$  elements of  $\bar{\mathbf{x}}$  provided that  $\Psi \leq \sqrt{2} \lambda \bar{x}_{\min}$  for some  $\lambda \in (0, 1)$ .

*Proof.* We aim at deriving a condition under which  $[p+q] \subset S^{n+\Delta}$ . To this end, it suffices to enforce

$$\min_{j \in [p+q]} |z_j^{n+\Delta}| > \max_{i \in \overline{S}} |z_i^{n+\Delta}|. \quad (7)$$

On one hand, for any  $j \in [p+q]$ ,

$$\begin{aligned} |z_j^{n+\Delta}| &= \left| (\mathbf{x}^{n+\Delta-1} - \eta \nabla F(\mathbf{x}^{n+\Delta-1}))_j \right| \\ &\geq |\bar{x}_j| - \left| (\mathbf{x}^{n+\Delta-1} - \bar{\mathbf{x}} - \eta \nabla F(\mathbf{x}^{n+\Delta-1}))_j \right| \\ &\geq |\bar{x}_{p+q}| - \left| (\mathbf{x}^{n+\Delta-1} - \bar{\mathbf{x}} - \eta \nabla F(\mathbf{x}^{n+\Delta-1}))_j \right|. \end{aligned}$$

On the other hand, for all  $i \in \overline{S}$ ,

$$|z_i^{n+\Delta}| = \left| (\mathbf{x}^{n+\Delta-1} - \bar{\mathbf{x}} - \eta \nabla F(\mathbf{x}^{n+\Delta-1}))_i \right|.$$

Hence, we know that to guarantee (7), it suffices to ensure for all  $j \in [p+q]$  and  $i \in \overline{S}$  that

$$|\bar{x}_{p+q}| > \left| (\mathbf{x}^{n+\Delta-1} - \bar{\mathbf{x}} - \eta \nabla F(\mathbf{x}^{n+\Delta-1}))_j \right| + \left| (\mathbf{x}^{n+\Delta-1} - \bar{\mathbf{x}} - \eta \nabla F(\mathbf{x}^{n+\Delta-1}))_i \right|.$$

Note that the right-hand side is upper bounded as follows:

$$\begin{aligned}
& \frac{1}{\sqrt{2}} \left| (\mathbf{x}^{n+\Delta-1} - \bar{\mathbf{x}} - \eta \nabla F(\mathbf{x}^{n+\Delta-1}))_j \right| + \frac{1}{\sqrt{2}} \left| (\mathbf{x}^{n+\Delta-1} - \bar{\mathbf{x}} - \eta \nabla F(\mathbf{x}^{n+\Delta-1}))_i \right| \\
& \leq \left\| (\mathbf{x}^{n+\Delta-1} - \bar{\mathbf{x}} - \eta \nabla F(\mathbf{x}^{n+\Delta-1}))_{\{j,i\}} \right\| \\
& \leq \left\| (\mathbf{x}^{n+\Delta-1} - \bar{\mathbf{x}} - \eta \nabla F(\mathbf{x}^{n+\Delta-1}) + \eta \nabla F(\bar{\mathbf{x}}))_{\{j,i\}} \right\| + \eta \left\| (\nabla F(\bar{\mathbf{x}}))_{\{j,i\}} \right\| \\
& \leq \phi_{2k} \left\| \mathbf{x}^{n+\Delta-1} - \bar{\mathbf{x}} \right\| + \eta \left\| \nabla_2 F(\bar{\mathbf{x}}) \right\| \\
& \leq \phi_{2k} \alpha \cdot \beta^{\Delta-1} \left\| \mathbf{x}^n - \bar{\mathbf{x}} \right\| + \phi \psi_1 + \eta \left\| \nabla_2 F(\bar{\mathbf{x}}) \right\|,
\end{aligned}$$

where  $\phi_{2k}$  is given by Lemma 17. Note that  $\phi_{2k} < 1$  whenever  $0 < \eta < 1/\rho_{2k}^+$ . Moreover,

$$\left\| \mathbf{x}^n - \bar{\mathbf{x}} \right\| \leq \gamma \left\| \bar{\mathbf{x}}_{\overline{S}^n} \right\| + \psi_2 \leq \gamma \left\| \bar{\mathbf{x}}_{[p]} \right\| + \psi_2 = \gamma \left\| \bar{\mathbf{x}}_{\{p+1, \dots, s\}} \right\| + \psi_2.$$

Put all the pieces together, we have

$$\begin{aligned}
& \frac{1}{\sqrt{2}} \left| (\mathbf{x}^{n+\Delta-1} - \bar{\mathbf{x}} - \eta \nabla F(\mathbf{x}^{n+\Delta-1}))_j \right| + \frac{1}{\sqrt{2}} \left| (\mathbf{x}^{n+\Delta-1} - \bar{\mathbf{x}} - \eta \nabla F(\mathbf{x}^{n+\Delta-1}))_i \right| \\
& \leq \alpha \gamma \cdot \beta^{\Delta-1} \left\| \bar{\mathbf{x}}_{\{p+1, \dots, s\}} \right\| + \alpha \psi_2 + \psi_1 + \eta \left\| \nabla_2 F(\bar{\mathbf{x}}) \right\| \\
& \leq \alpha \gamma \cdot \beta^{\Delta-1} \left\| \bar{\mathbf{x}}_{\{p+1, \dots, s\}} \right\| + \alpha \psi_2 + \psi_1 + \frac{1}{\rho_{2k}} \left\| \nabla_2 F(\bar{\mathbf{x}}) \right\|.
\end{aligned}$$

Therefore, when

$$\sqrt{2} |\bar{x}_{p+q}| > \alpha \gamma \cdot \beta^{\Delta-1} \left\| \bar{\mathbf{x}}_{\{p+1, \dots, s\}} \right\| + \alpha \psi_2 + \psi_1 + \frac{1}{\rho_{2k}} \left\| \nabla_2 F(\bar{\mathbf{x}}) \right\|,$$

we always have (7). Note that the above holds as far as  $\Psi := \alpha \psi_2 + \psi_1 + \frac{1}{\rho_{2k}} \left\| \nabla_2 F(\bar{\mathbf{x}}) \right\|$  is strictly smaller than  $\sqrt{2} |\bar{x}_s|$ .  $\square$

**Theorem 9** (Restatement of Theorem 6). *Assume same conditions as in Lemma 5. Then PHT( $r$ ) successfully identifies the support of  $\bar{\mathbf{x}}$  using  $\left( \frac{\log 2}{2 \log(1/\beta)} + \frac{\log(\alpha \gamma / (1-\lambda))}{\log(1/\beta)} + 2 \right) s$  number of iterations.*

*Proof.* We partition the support set  $S = [s]$  into  $K$  folds  $S_1, S_2, \dots, S_K$ , where each  $S_i$  is defined as follows:

$$S_i = \{s_{i-1} + 1, \dots, s_i\}, \forall 1 \leq i \leq K.$$

Here,  $s_0 = 0$  and for all  $1 \leq i \leq K$ , the quantity  $s_i$  is inductively given by

$$s_i = \max \left\{ q : s_{i-1} + 1 \leq q \leq s \text{ and } |\bar{x}_q| > \frac{1}{\sqrt{2}} |\bar{x}_{s_{i-1}+1}| \right\}.$$

In this way, we note that for any two index sets  $S_i$  and  $S_j$ ,  $S_i \cap S_j = \emptyset$  if  $i \neq j$ . We also know by the definition of  $s_i$  that

$$|\bar{x}_{s_i+1}| \leq \frac{1}{\sqrt{2}} |\bar{x}_{s_{i-1}+1}|, \forall 1 \leq i \leq K-1. \quad (8)$$

Now we show that after a finite number of iterations, say  $n$ , the union of the  $S_i$ 's is contained in  $S^n$ , i.e., the support set of the iterate  $\mathbf{x}^n$ . To this end, we prove that for all  $0 \leq i \leq K$ ,

$$\bigcup_{t=0}^i S_t \subset S^{n_0+n_1+\dots+n_i} \quad (9)$$

for some  $n_i$ 's given below. Above,  $S_0 = \emptyset$ .

We pick  $n_0 = 0$  and it is easy to verify that  $S_0 \subset S^0$ . Now suppose that (9) holds for  $i-1$ . That is, the index set of the top  $s_{i-1}$  elements of  $\bar{\mathbf{x}}$  is contained in  $S^{n_0+\dots+n_{i-1}}$ . Due to Lemma 5, (9) holds for  $i$  as long as  $n_i$  satisfies

$$\sqrt{2} |\bar{x}_{s_i}| > \alpha \gamma \cdot \beta^{n_{i-1}} \left\| \bar{\mathbf{x}}_{\{s_{i-1}+1, \dots, s\}} \right\| + \Psi, \quad (10)$$

where  $\Psi$  is given in Lemma 5. Note that

$$\begin{aligned} \|\bar{\mathbf{x}}_{\{s_{i-1}+1, \dots, s\}}\|^2 &= \|\bar{\mathbf{x}}_{S_i}\|^2 + \dots + \|\bar{\mathbf{x}}_{S_K}\|^2 \\ &\leq (\bar{x}_{s_{i-1}+1})^2 |S_i| + \dots + (\bar{x}_{s_{r-1}+1})^2 |S_K| \\ &\leq (\bar{x}_{s_{i-1}+1})^2 (|S_i| + 2^{-1} |S_{i+1}| + \dots + 2^{i-K} |S_K|) \\ &< 2(\bar{x}_{s_i})^2 (|S_i| + 2^{-1} |S_{i+1}| + \dots + 2^{i-K} |S_K|), \end{aligned}$$

where the second inequality follows from (8) and the last inequality follows from the definition of  $q_i$ . Denote for simplicity

$$W_i := |S_i| + 2^{-1} |S_{i+1}| + \dots + 2^{i-K} |S_K|.$$

As we assumed  $\Psi \leq \sqrt{2}\lambda\bar{x}_{\min}$ , we get

$$\alpha\gamma \cdot \beta^{n_i-1} \|\bar{\mathbf{x}}_{\{s_{i-1}+1, \dots, s\}}\| + \Psi < \sqrt{2}\alpha\gamma |\bar{x}_{s_i}| \beta^{n_i-1} \sqrt{W_i} + \sqrt{2}\lambda |\bar{x}_{s_i}|.$$

Picking

$$n_i = \log_{1/\beta} \frac{\alpha\gamma\sqrt{W_i}}{1-\lambda} + 2$$

guarantees (10). It remains to calculate the total number of iterations. In fact, we have

$$\begin{aligned} t_{\max} &= n_0 + n_1 + \dots + n_K \\ &= \frac{1}{2\log(1/\beta)} \sum_{i=1}^K \log W_i + K \cdot \frac{\log(\alpha\gamma/(1-\lambda))}{\log(1/\beta)} + 2K \\ &\stackrel{\zeta_1}{\leq} \frac{K}{2\log(1/\beta)} \log \left( \frac{1}{K} \sum_{i=1}^K W_i \right) + \left( \frac{\log(\alpha\gamma/(1-\lambda))}{\log(1/\beta)} + 2 \right) K \\ &\stackrel{\zeta_2}{\leq} \frac{K}{2\log(1/\beta)} \log \left( \frac{2}{K} \sum_{i=1}^K |S_i| \right) + \left( \frac{\log(\alpha\gamma/(1-\lambda))}{\log(1/\beta)} + 2 \right) K \\ &= \frac{K}{2\log(1/\beta)} \log \frac{2s}{K} + \left( \frac{\log(\alpha\gamma/(1-\lambda))}{\log(1/\beta)} + 2 \right) K \\ &\stackrel{\zeta_3}{\leq} \left( \frac{\log 2}{2\log(1/\beta)} + \frac{\log(\alpha\gamma/(1-\lambda))}{\log(1/\beta)} + 2 \right) s. \end{aligned}$$

Above,  $\zeta_1$  immediately follows by observing that the logarithmic function is concave.  $\zeta_2$  uses the fact that after rearrangement, the coefficient of  $|S_i|$  is  $\sum_{j=0}^{i-1} 2^{-j}$  which is always smaller than 2. Finally, since the function  $a \log(2s/a)$  is monotonically increasing with respect to  $a$  and  $1 \leq a \leq s$ ,  $\zeta_3$  follows.  $\square$

**Lemma 10** (Restatement of Lemma 7). *Assume that  $F(\mathbf{x})$  satisfies the properties of RSC and RSS at sparsity level  $k + s + r$ . Let  $\rho^- := \rho_{k+s+r}^-$  and  $\rho^+ := \rho_{k+s+r}^+$ . Consider the support set  $J^t = S^{t-1} \cup \text{supp}(\nabla F(\mathbf{x}^{t-1}), r)$ . We have for any  $0 < \theta \leq 1/\rho^+$ ,*

$$\|\bar{\mathbf{x}}_{J^t}\| \leq \nu(1 - \theta\rho^-) \|\mathbf{x}^{t-1} - \bar{\mathbf{x}}\| + \frac{\nu}{\rho^-} \|\nabla_{s+r} F(\bar{\mathbf{x}})\|,$$

where  $\nu = \sqrt{s - r + 2}$ . In particular, picking  $\theta = 1/\rho^+$  gives

$$\|\bar{\mathbf{x}}_{J^t}\| \leq \nu \left( 1 - \frac{1}{\kappa} \right) \|\mathbf{x}^{t-1} - \bar{\mathbf{x}}\| + \frac{\nu}{\rho^-} \|\nabla_{s+r} F(\bar{\mathbf{x}})\|.$$

*Proof.* Let  $T = \text{supp}(\nabla F(\mathbf{x}^{t-1}), r)$ . Then  $J^t = S^{t-1} \cup T$  and  $S^{t-1} \cap T = \emptyset$ . Since  $T$  contains the top  $r$  elements of  $\nabla F(\mathbf{x}^{t-1})$ , we have that each element in  $T \setminus S$  is larger (in magnitude) than that in  $S \setminus T$ . In particular, we observe for  $T \neq S$  that

$$\frac{1}{|T \setminus S|} \left\| (\nabla F(\mathbf{x}^{t-1}))_{T \setminus S} \right\|^2 \geq \frac{1}{|S \setminus T|} \left\| (\nabla F(\mathbf{x}^{t-1}))_{S \setminus T} \right\|^2,$$

which implies

$$\left\| (\nabla F(\mathbf{x}^{t-1}))_{T \setminus S} \right\| \geq \sqrt{\frac{r - |T \cap S|}{s - |T \cap S|}} \left\| (\nabla F(\mathbf{x}^{t-1}))_{S \setminus T} \right\| \geq \sqrt{\frac{1}{s - r + 1}} \left\| (\nabla F(\mathbf{x}^{t-1}))_{S \setminus T} \right\|.$$

Since  $\nabla F(\mathbf{x}^{t-1})$  is supported on  $\overline{S^{t-1}}$ , the LHS reads as

$$\left\| (\nabla F(\mathbf{x}^{t-1}))_{T \setminus S} \right\| = \left\| (\nabla F(\mathbf{x}^{t-1}))_{T \setminus (S \cup S^{t-1})} \right\| = \frac{1}{\theta} \left\| (\mathbf{x}^{t-1} - \theta \nabla F(\mathbf{x}^{t-1}) - \bar{\mathbf{x}})_{T \setminus (S \cup S^{t-1})} \right\|.$$

Now we look at the RHS. It follows that

$$\begin{aligned} \left\| (\nabla F(\mathbf{x}^{t-1}))_{S \setminus T} \right\| &= \left\| (\nabla F(\mathbf{x}^{t-1}))_{S \setminus (T \cup S^{t-1})} \right\| \\ &= \frac{1}{\theta} \left\| (\mathbf{x}^{t-1} - \theta \nabla F(\mathbf{x}^{t-1}) - \bar{\mathbf{x}})_{S \setminus (T \cup S^{t-1})} + \bar{\mathbf{x}}_{S \setminus (T \cup S^{t-1})} \right\| \\ &\geq \frac{1}{\theta} \left\| \bar{\mathbf{x}}_{S \setminus (T \cup S^{t-1})} \right\| - \frac{1}{\theta} \left\| (\mathbf{x}^t - \theta \nabla F(\mathbf{x}^t) - \bar{\mathbf{x}})_{S \setminus (T \cup S^{t-1})} \right\|. \end{aligned}$$

Hence,

$$\begin{aligned} &\left\| \bar{\mathbf{x}}_{\overline{J^t}} \right\| \\ &= \left\| \bar{\mathbf{x}}_{S \setminus (T \cup S^{t-1})} \right\| \\ &\leq \sqrt{s - r + 1} \left\| (\mathbf{x}^{t-1} - \theta \nabla F(\mathbf{x}^{t-1}) - \bar{\mathbf{x}})_{T \setminus (S \cup S^{t-1})} \right\| + \left\| (\mathbf{x}^{t-1} - \theta \nabla F(\mathbf{x}^{t-1}) - \bar{\mathbf{x}})_{S \setminus (T \cup S^{t-1})} \right\| \\ &\leq \sqrt{s - r + 1} \left\| (\mathbf{x}^{t-1} - \theta \nabla F(\mathbf{x}^{t-1}) - \bar{\mathbf{x}})_{T \setminus S} \right\| + \left\| (\mathbf{x}^{t-1} - \theta \nabla F(\mathbf{x}^{t-1}) - \bar{\mathbf{x}})_{S \setminus T} \right\| \\ &\leq \nu \left\| (\mathbf{x}^{t-1} - \theta \nabla F(\mathbf{x}^{t-1}) - \bar{\mathbf{x}})_{T \Delta S} \right\| \\ &\leq \nu \left\| (\mathbf{x}^{t-1} - \theta \nabla F(\mathbf{x}^{t-1}) - \bar{\mathbf{x}} + \theta \nabla F(\bar{\mathbf{x}}))_{T \Delta S} \right\| + \nu \theta \left\| (\nabla F(\bar{\mathbf{x}}))_{T \Delta S} \right\| \\ &\leq \nu \phi_{k+s+r} \left\| \mathbf{x}^{t-1} - \bar{\mathbf{x}} \right\| + \nu \theta \left\| (\nabla F(\bar{\mathbf{x}}))_{T \Delta S} \right\|, \end{aligned}$$

where  $\nu = \sqrt{s - r + 2}$  and the last inequality uses Lemma 18. For any  $0 < \theta \leq 1/\rho^+$ , we have

$$\left\| \bar{\mathbf{x}}_{\overline{J^t}} \right\| \leq \nu(1 - \theta m) \left\| \mathbf{x}^{t-1} - \bar{\mathbf{x}} \right\| + \frac{\nu}{\rho^-} \left\| \nabla_{s+r} F(\bar{\mathbf{x}}) \right\|.$$

□

## A.1 Proof of Prop. 2

*Proof.* Recall that we set  $k = s$ . Using Lemma 11, we have

$$F(\mathbf{x}^t) - F(\bar{\mathbf{x}}) \leq \mu_t (F(\mathbf{x}^{t-1}) - F(\bar{\mathbf{x}})),$$

where  $\mu_t = 1 - 2\rho_{2s}^- \eta(1 - \eta\rho_{2s}^+) \cdot \frac{|S^t \setminus S^{t-1}|}{|S^t \setminus S^{t-1}| + |S \setminus S^{t-1}|}$ . Now combining this with Prop. 21, we have

$$\left\| \mathbf{x}^t - \bar{\mathbf{x}} \right\| \leq \sqrt{2\kappa} \sqrt{\mu_1 \mu_2 \dots \mu_t} \left\| \mathbf{x}^0 - \bar{\mathbf{x}} \right\| + \frac{3}{\rho_{2s}^-} \left\| \nabla_{2s} F(\bar{\mathbf{x}}) \right\|.$$

Note that before the algorithm terminates,  $1 \leq |S^t \setminus S^{t-1}| \leq r$ . Hence,

$$\mu_t \leq 1 - \frac{2\eta\rho_{2s}^-(1 - \eta\rho_{2s}^+)}{1 + s} =: \mu.$$

It then follows that

$$\left\| \mathbf{x}^t - \bar{\mathbf{x}} \right\| \leq \sqrt{2\kappa} (\sqrt{\mu})^t \left\| \mathbf{x}^0 - \bar{\mathbf{x}} \right\| + \frac{3}{\eta} \left\| \nabla_{2s} F(\bar{\mathbf{x}}) \right\|. \quad (11)$$

Lemma 19 tells us

$$\left\| \mathbf{x}^t - \bar{\mathbf{x}} \right\| \leq \kappa \left\| \bar{\mathbf{x}}_{\overline{S^t}} \right\| + \frac{1}{\eta} \left\| \nabla_s F(\bar{\mathbf{x}}) \right\|. \quad (12)$$

Hence, in light of Lemma 5 and Theorem 6, we obtain that  $\text{PHT}(r)$  recovers the support using at most

$$t_{\max} = \left( \frac{\log 2}{\log(1/\mu)} + \frac{\log(2\kappa)}{\log(1/\mu)} + \frac{2\log(\kappa/(1-\lambda))}{\log(1/\mu)} + 2 \right) \|\bar{\mathbf{x}}\|_0$$

iterations. Note that picking  $\eta = O(1/\rho_{2s}^+)$ , we have  $\mu = O(1 - \frac{1}{\kappa})$  and  $\log(1/\mu) = O(1/\kappa)$ . This gives the  $O(s\kappa \log \kappa)$  bound.  $\square$

**Lemma 11.** *Consider the  $\text{PHT}(r)$  algorithm. Suppose that  $F(\mathbf{x})$  is  $\rho_{k+s}^-$ -RSC and  $\rho_{2k}^+$ -RSS. Using the parameter  $k = s$  and  $\eta < 1/\rho_{2s}^+$ , we have*

$$F(\mathbf{x}^t) - F(\bar{\mathbf{x}}) \leq \mu_t (F(\mathbf{x}^{t-1}) - F(\bar{\mathbf{x}})),$$

where  $\mu_t = 1 - 2\eta\rho_{2s}^-(1 - \eta\rho_{2s}^+) \cdot \frac{|S^t \setminus S^{t-1}|}{|S^t \setminus S^{t-1}| + |S \setminus S^{t-1}|}$ .

*Proof.* Using the RSS property, we have

$$\begin{aligned} F(\mathbf{z}_{S^t}^t) - F(\mathbf{x}^{t-1}) &\leq \langle \nabla F(\mathbf{x}^{t-1}), \mathbf{z}_{S^t}^t - \mathbf{x}^{t-1} \rangle + \frac{\rho_{2s}^+}{2} \|\mathbf{z}_{S^t}^t - \mathbf{x}^{t-1}\|^2 \\ &\stackrel{\zeta_1}{=} \left\langle \nabla_{S^t \setminus S^{t-1}} F(\mathbf{x}^{t-1}), \mathbf{z}_{S^t \setminus S^{t-1}}^t \right\rangle + \frac{\rho_{2s}^+}{2} \left( \|\mathbf{z}_{S^t \setminus S^{t-1}}^t\|^2 \right. \\ &\quad \left. + \|\mathbf{z}_{S^t \cap S^{t-1}}^t - \mathbf{x}_{S^t \cap S^{t-1}}^{t-1}\|^2 + \|\mathbf{x}_{S^{t-1} \setminus S^t}^{t-1}\|^2 \right) \\ &\stackrel{\zeta_2}{\leq} \left\langle \nabla_{S^t \setminus S^{t-1}} F(\mathbf{x}^{t-1}), \mathbf{z}_{S^t \setminus S^{t-1}}^t \right\rangle + \rho_{2s}^+ \|\mathbf{z}_{S^t \setminus S^{t-1}}^t\|^2 \\ &\stackrel{\zeta_3}{=} -\eta(1 - \eta\rho_{2s}^+) \|\nabla_{S^t \setminus S^{t-1}} F(\mathbf{x}^{t-1})\|^2. \end{aligned}$$

Above, we observe that  $\nabla F(\mathbf{x}^{t-1})$  is supported on  $\overline{S^{t-1}}$  and we simply decompose the support set  $S^t \cup S^{t-1}$  into three mutually disjoint sets, and hence  $\zeta_1$  holds. To see why  $\zeta_2$  holds, we note that for any set  $\Omega \subset S^{t-1}$ ,  $\mathbf{z}_{\Omega}^t = \mathbf{x}_{\Omega}^{t-1}$ . Hence,  $\mathbf{z}_{S^t \cap S^{t-1}}^t = \mathbf{x}_{S^t \cap S^{t-1}}^{t-1}$ . Moreover, since  $\mathbf{x}_{S^{t-1} \setminus S^t}^{t-1} = \mathbf{z}_{S^{t-1} \setminus S^t}^t$  and any element in  $\mathbf{z}_{S^t \setminus S^{t-1}}^t$  is not larger than that in  $\mathbf{z}_{S^t \setminus S^{t-1}}^t$  (recall that  $S^t$  is obtained by hard thresholding), we have  $\|\mathbf{x}_{S^{t-1} \setminus S^t}^{t-1}\| \leq \|\mathbf{z}_{S^t \setminus S^{t-1}}^t\|$  where we use the fact that  $|S^t \setminus S^t| = |S^t \setminus S^{t-1}|$ . Therefore,  $\zeta_2$  holds. Finally, we write  $\mathbf{z}_{S^t \setminus S^{t-1}}^t = -\eta \nabla_{S^t \setminus S^{t-1}} F(\mathbf{x}^{t-1})$  and obtain  $\zeta_3$ .

Since  $\mathbf{x}^t$  is a minimizer of  $F(\mathbf{x})$  over the support set  $S^t$ , it immediately follows that

$$F(\mathbf{x}^t) - F(\mathbf{x}^{t-1}) \leq F(\mathbf{z}_{S^t}^t) - F(\mathbf{x}^{t-1}) \leq -\eta(1 - \eta\rho_{2s}^+) \|\nabla_{S^t \setminus S^{t-1}} F(\mathbf{x}^{t-1})\|^2.$$

Now we invoke Lemma 12 and pick  $\eta \leq 1/\rho_{2s}^+$ ,

$$F(\mathbf{x}^t) - F(\mathbf{x}^{t-1}) \leq -2m\eta(1 - \eta\rho_{2s}^+) \cdot \frac{|S^t \setminus S^{t-1}|}{|S^t \setminus S^{t-1}| + |S \setminus S^{t-1}|} (F(\mathbf{x}^{t-1}) - F(\bar{\mathbf{x}})),$$

which gives

$$F(\mathbf{x}^t) - F(\bar{\mathbf{x}}) \leq \mu_t (F(\mathbf{x}^{t-1}) - F(\bar{\mathbf{x}})),$$

where  $\mu_t = 1 - 2\eta\rho_{2s}^-(1 - \eta\rho_{2s}^+) \cdot \frac{|S^t \setminus S^{t-1}|}{|S^t \setminus S^{t-1}| + |S \setminus S^{t-1}|}$ .  $\square$

**Lemma 12.** *Consider the  $\text{PHT}(r)$  algorithm and assume  $F(\mathbf{x})$  is  $\rho_{k+s}^-$ -RSC. Then for all  $t \geq 1$ ,*

$$\|\nabla_{S^t \setminus S^{t-1}} F(\mathbf{x}^{t-1})\|^2 \geq 2\rho_{k+s}^- \delta_t (F(\mathbf{x}^{t-1}) - F(\bar{\mathbf{x}})),$$

where

$$\delta_t = \frac{|S^t \setminus S^{t-1}|}{|S^t \setminus S^{t-1}| + |S \setminus S^{t-1}|}.$$

*Proof.* The lemma holds clearly for either  $S^t = S^{t-1}$  or  $F(\mathbf{x}^t) \leq F(\bar{\mathbf{x}})$ . Hence, in the following we only prove the result by assuming  $S^t \neq S^{t-1}$  and  $F(\mathbf{x}^t) > F(\bar{\mathbf{x}})$ . Due to the RSC property, we have

$$F(\bar{\mathbf{x}}) - F(\mathbf{x}^{t-1}) - \langle \nabla F(\mathbf{x}^{t-1}), \bar{\mathbf{x}} - \mathbf{x}^{t-1} \rangle \geq \frac{\rho_{k+s}^-}{2} \|\bar{\mathbf{x}} - \mathbf{x}^{t-1}\|^2,$$

which implies

$$\begin{aligned} \langle \nabla F(\mathbf{x}^{t-1}), -\bar{\mathbf{x}} \rangle &\geq \frac{\rho_{k+s}^-}{2} \|\bar{\mathbf{x}} - \mathbf{x}^{t-1}\|^2 + F(\mathbf{x}^{t-1}) - F(\bar{\mathbf{x}}) \\ &\geq \sqrt{2\rho_{k+s}^-} \|\bar{\mathbf{x}} - \mathbf{x}^{t-1}\| \sqrt{F(\mathbf{x}^{t-1}) - F(\bar{\mathbf{x}})}. \end{aligned}$$

By invoking Lemma 13 with  $\mathbf{u} = \nabla F(\mathbf{x}^{t-1})$  and  $\mathbf{z} = -\bar{\mathbf{x}}$  therein, we have

$$\begin{aligned} \langle \nabla F(\mathbf{x}^{t-1}), -\bar{\mathbf{x}} \rangle &\leq \sqrt{\frac{|S \setminus S^{t-1}|}{|S^t \setminus S^{t-1}|} + 1} \|\nabla_{S^t \setminus S^{t-1}} F(\mathbf{x}^{t-1})\| \cdot \|\bar{\mathbf{x}}_{S \setminus S^{t-1}}\| \\ &= \sqrt{\frac{|S \setminus S^{t-1}|}{|S^t \setminus S^{t-1}|} + 1} \|\nabla_{S^t \setminus S^{t-1}} F(\mathbf{x}^{t-1})\| \cdot \|(\bar{\mathbf{x}} - \mathbf{x}^t)_{S \setminus S^{t-1}}\| \\ &\leq \sqrt{\frac{|S \setminus S^{t-1}|}{|S^t \setminus S^{t-1}|} + 1} \|\nabla_{S^t \setminus S^{t-1}} F(\mathbf{x}^{t-1})\| \cdot \|\bar{\mathbf{x}} - \mathbf{x}^t\|. \end{aligned}$$

It is worth mentioning that the first inequality above holds because  $\nabla F(\mathbf{x}^{t-1})$  is supported on  $\overline{S^{t-1}}$  and  $S^t \setminus S^{t-1}$  contains the  $|S^t \setminus S^{t-1}|$  number of largest (in magnitude) elements of  $\nabla F(\mathbf{x}^{t-1})$ . Therefore, we obtain the result.  $\square$

**Lemma 13** (Lemma 1 in [28]). *Let  $\mathbf{u}$  and  $\mathbf{z}$  be two distinct vectors and let  $W = \text{supp}(\mathbf{u}) \cap \text{supp}(\mathbf{z})$ . Also, let  $U$  be the support set of the top  $r$  (in magnitude) elements in  $\mathbf{u}$ . Then, the following holds for all  $r \geq 1$ :*

$$\langle \mathbf{u}, \mathbf{z} \rangle \leq \sqrt{\left\lceil \frac{|W|}{r} \right\rceil} \|\mathbf{u}_U\| \cdot \|\mathbf{z}_W\|.$$

## A.2 Proof of Theorem 3

*Proof.* Let  $\rho^- := \rho_{2s+r}^-$  and  $\rho^+ := \rho_{2s+r}^+$ . Let  $\phi := \phi_{2s+r} = 1 - \eta\rho^-$  be the quantity given in Lemma 17. Using Lemma 14, we obtain

$$\|\mathbf{x}^t - \bar{\mathbf{x}}\| \leq \left( \sqrt{2}\phi\kappa + \nu(\kappa - 1) \right) \|\mathbf{x}^{t-1} - \bar{\mathbf{x}}\| + \frac{2\nu + 4}{\rho^-} \|\nabla_{s+r} F(\bar{\mathbf{x}})\|,$$

where  $\nu = \sqrt{s - r + 2}$ . We need to ensure that the convergence coefficient is smaller than 1. Consider  $\eta = \eta'/\rho^+$  with  $\eta' \in (0, 1]$  for which  $\phi = 1 - \eta'/\kappa$ . It follows that

$$\sqrt{2}\phi\kappa + \nu(\kappa - 1) = \sqrt{2}(\kappa - \eta') + \nu(\kappa - 1) \leq (\sqrt{2} + \nu)(\kappa - \eta').$$

Hence, when we pick  $1 - \frac{1}{\sqrt{2} + \nu} < \eta' \leq 1$ , and the condition number satisfies

$$\kappa < \eta' + \frac{1}{\sqrt{2} + \nu},$$

the sequence of  $\mathbf{x}^t - \bar{\mathbf{x}}$  contracts. On the other hand, using Lemma 19 we get

$$\|\mathbf{x}^t - \bar{\mathbf{x}}\| \leq \kappa \|\bar{\mathbf{x}}_{S^t}\| + \frac{1}{\rho^-} \|\nabla_s F(\bar{\mathbf{x}})\|.$$

Hence, applying Lemma 5 and Theorem 6 we obtain the result.  $\square$

**Lemma 14.** Consider the PHT( $r$ ) algorithm with  $k = s$ . Suppose that  $F(\mathbf{x})$  is  $\rho_{2s+r}^-$ -RSC and  $\rho_{2s+r}^+$ -RSS. Further suppose that  $\kappa < 2$ . Let the step size  $\eta \leq 1/\rho_{2s+r}^+$ . Then it holds that

$$\|\mathbf{x}^t - \bar{\mathbf{x}}\| \leq \left( \sqrt{2}\phi\kappa + \nu(\kappa - 1) \right) \|\mathbf{x}^{t-1} - \bar{\mathbf{x}}\| + \frac{2\nu + 4}{\rho_{2s+r}^-} \|\nabla_{s+r} F(\bar{\mathbf{x}})\|,$$

where  $\phi = 1 - \eta\rho_{2s+r}^-$  and  $\nu = \sqrt{s - r + 2}$ .

*Proof.* Consider the vector  $\mathbf{z}_{J^t}^t$ . It is easy to see that  $J^t \setminus S^t$  contains the  $r$  smallest elements of  $\mathbf{z}_{J^t}^t$ . Hence, for any subset  $T \subset J^t$  such that  $|T| \geq r$ , we have

$$\|\mathbf{z}_{J^t \setminus S^t}^t\| \leq \|\mathbf{z}_T^t\|.$$

In particular, we choose  $T = J^t \setminus S$  and obtain

$$\|\mathbf{z}_{J^t \setminus S^t}^t\| \leq \|\mathbf{z}_{J^t \setminus S}^t\|.$$

Eliminating the common contribution from  $J^t \setminus (S^t \cup S)$  gives

$$\|\mathbf{z}_{J^t \cap S \setminus S^t}^t\| \leq \|\mathbf{z}_{J^t \cap S^t \setminus S}^t\|. \quad (13)$$

The LHS of (13) reads as

$$\begin{aligned} \|\mathbf{z}_{J^t \cap S \setminus S^t}^t\| &= \|(\mathbf{x}^{t-1} - \eta \nabla F(\mathbf{x}^{t-1}) - \bar{\mathbf{x}})_{J^t \cap S \setminus S^t} + \bar{\mathbf{x}}_{J^t \cap S^t}\| \\ &\geq \|\bar{\mathbf{x}}_{J^t \setminus S^t}\| - \|(\mathbf{x}^{t-1} - \eta \nabla F(\mathbf{x}^{t-1}) - \bar{\mathbf{x}})_{J^t \cap S \setminus S^t}\|, \end{aligned}$$

while the RHS (13) is given by

$$\|\mathbf{z}_{J^t \cap S^t \setminus S}^t\| = \|(\mathbf{x}^{t-1} - \eta \nabla F(\mathbf{x}^{t-1}) - \bar{\mathbf{x}})_{J^t \cap S^t \setminus S}\|.$$

Hence, we have

$$\begin{aligned} \|\bar{\mathbf{x}}_{J^t \setminus S^t}\| &\leq \|(\mathbf{x}^{t-1} - \eta \nabla F(\mathbf{x}^{t-1}) - \bar{\mathbf{x}})_{J^t \cap S \setminus S^t}\| + \|(\mathbf{x}^{t-1} - \eta \nabla F(\mathbf{x}^{t-1}) - \bar{\mathbf{x}})_{J^t \cap S^t \setminus S}\| \\ &\leq \sqrt{2} \|(\mathbf{x}^{t-1} - \eta \nabla F(\mathbf{x}^{t-1}) - \bar{\mathbf{x}})_{J^t}\| \\ &\leq \sqrt{2}\phi_{2s+r} \|\mathbf{x}^{t-1} - \bar{\mathbf{x}}\| + \sqrt{2}\eta \|\nabla_{k+r} F(\bar{\mathbf{x}})\|, \end{aligned}$$

where we use Lemma 18 for the last inequality and  $\phi_{2s+r} = 1 - \eta\rho_{2s+r}^-$  for  $\eta \leq 1/\rho_{2s+r}^+$ . On the other hand, Lemma 7 shows that

$$\|\bar{\mathbf{x}}_{\bar{J}^t}\| \leq \nu \left( 1 - \frac{1}{\kappa} \right) \|\mathbf{x}^{t-1} - \bar{\mathbf{x}}\| + \frac{\nu}{\rho_{2s+r}^-} \|\nabla_{s+r} F(\bar{\mathbf{x}})\|,$$

where  $\nu = \sqrt{s - r + 2}$ . The fact  $\bar{S}^t = (J^t \setminus S^t) \cup \bar{J}^t$  implies

$$\begin{aligned} \|\bar{\mathbf{x}}_{\bar{S}^t}\| &\leq \|\bar{\mathbf{x}}_{J^t \setminus S^t}\| + \|\bar{\mathbf{x}}_{\bar{J}^t}\| \\ &\leq \left( \sqrt{2}\phi_{2s+r} + \nu \left( 1 - \frac{1}{\kappa} \right) \right) \|\mathbf{x}^{t-1} - \bar{\mathbf{x}}\| + \left( \sqrt{2}\eta + \frac{\nu}{\rho_{2s+r}^-} \right) \|\nabla_{k+r} F(\bar{\mathbf{x}})\|. \end{aligned}$$

Next, we invoke Lemma 19 to get

$$\|\mathbf{x}^t - \bar{\mathbf{x}}\| \leq \kappa \|\bar{\mathbf{x}}_{\bar{S}^t}\| + \frac{1}{\rho_{2s+r}^-} \|\nabla_k F(\bar{\mathbf{x}})\|.$$

Therefore,

$$\begin{aligned} \|\mathbf{x}^t - \bar{\mathbf{x}}\| &\leq \left( \sqrt{2}\phi_{2s+r}\kappa + \nu(\kappa - 1) \right) \|\mathbf{x}^{t-1} - \bar{\mathbf{x}}\| + \left( \sqrt{2}\eta\kappa + \frac{\nu\kappa}{\rho_{2s+r}^-} + \frac{1}{\rho_{2s+r}^-} \right) \|\nabla_{s+r} F(\bar{\mathbf{x}})\| \\ &\leq \left( \sqrt{2}\phi_{2s+r}\kappa + \nu(\kappa - 1) \right) \|\mathbf{x}^{t-1} - \bar{\mathbf{x}}\| + \frac{2\nu + 4}{\rho_{2s+r}^-} \|\nabla_{s+r} F(\bar{\mathbf{x}})\|, \end{aligned}$$

where we use the assumption that  $\kappa < 2$  and  $\eta \leq 1/\rho_{2s+r}^+ < 1/\rho_{2s+r}^-$  for the last inequality.  $\square$

### A.3 Proof of Theorem 4

*Proof.* Using Lemma 15, we have

$$F(\mathbf{x}^t) - F(\bar{\mathbf{x}}) \leq \mu (F(\mathbf{x}^{t-1}) - F(\bar{\mathbf{x}})),$$

where

$$\mu = 1 - \frac{\eta \rho_{2k}^- (1 - \eta \rho_{2k}^+)}{2}.$$

Now Prop. 21 suggests that

$$\|\mathbf{x}^t - \bar{\mathbf{x}}\| \leq \sqrt{2\kappa} (\sqrt{\mu})^t \|\mathbf{x}^0 - \bar{\mathbf{x}}\| + \frac{3}{\rho_{2k}^-} \|\nabla_{k+s} F(\bar{\mathbf{x}})\|,$$

and Lemma 19 implies

$$\|\mathbf{x}^t - \bar{\mathbf{x}}\| \leq \kappa \|\bar{\mathbf{x}}_{S^t}\| + \frac{1}{\rho_{2k}^-} \|\nabla_k F(\bar{\mathbf{x}})\|.$$

Combining these with Lemma 5 and Theorem 6 we complete the proof.  $\square$

**Lemma 15.** Consider the PHT( $r$ ) algorithm. Suppose that  $F(\mathbf{x})$  is  $\rho_{2k}^-$ -RSC and  $\rho_{2k}^+$ -RSS, and let  $\kappa = \rho_{2k}^+/\rho_{2k}^-$  be the condition number. Picking the step size  $0 < \eta < 1/\rho_{2k}^+$  and the sparsity parameter  $k \geq s + \left(1 + \frac{4}{\eta^2(\rho_{2k}^-)^2}\right) \min\{r, s\}$ , then we have

$$F(\mathbf{x}^t) - F(\mathbf{x}^{t-1}) \leq -\frac{\eta \rho_{2k}^- (1 - \eta \rho_{2k}^+)}{2} (F(\mathbf{x}^{t-1}) - F(\bar{\mathbf{x}})).$$

*Proof.* Using Lemma 16 we obtain

$$F(\mathbf{x}^t) - F(\mathbf{x}^{t-1}) \leq -\frac{1 - \eta \rho_{2k}^+}{2\eta} \|\mathbf{z}_{S^t}^t - \mathbf{x}^{t-1}\|^2.$$

Note that for the right-hand side, we may expand it as follows:

$$\begin{aligned} \|\mathbf{z}_{S^t}^t - \mathbf{x}^{t-1}\|^2 &= \|\mathbf{x}_{S^t}^{t-1} - \mathbf{x}^{t-1} - \eta \nabla_{S^t} F(\mathbf{x}^{t-1})\|^2 \\ &= \left\| -\mathbf{x}_{S^{t-1} \setminus S^t}^{t-1} - \eta \nabla_{S^t \setminus S^{t-1}} F(\mathbf{x}^{t-1}) \right\|^2 \\ &= \left\| \mathbf{x}_{S^{t-1} \setminus S^t}^{t-1} \right\|^2 + \eta^2 \left\| \nabla_{S^t \setminus S^{t-1}} F(\mathbf{x}^{t-1}) \right\|^2, \end{aligned}$$

where we use the fact that  $\mathbf{x}^{t-1}$  is supported on  $S^{t-1}$  and  $\nabla F(\mathbf{x}^{t-1})$  is support on  $\overline{S^{t-1}}$  for the second equality, and the third one follows in that the support sets are disjoint. It then follows quickly that

$$F(\mathbf{x}^t) - F(\mathbf{x}^{t-1}) \leq -\frac{(1 - \eta \rho_{2k}^+) \eta}{2} \left\| \nabla_{S^t \setminus S^{t-1}} F(\mathbf{x}^{t-1}) \right\|^2.$$

It remains to lower bound the right-hand side in terms of  $F(\mathbf{x}^{t-1}) - F(\bar{\mathbf{x}})$ . In fact, in the following, we show that

$$\left\| \nabla_{S^t \setminus S^{t-1}} F(\mathbf{x}^{t-1}) \right\|^2 \geq \rho_{2k}^- (F(\mathbf{x}^{t-1}) - F(\bar{\mathbf{x}})). \quad (14)$$

This suggests

$$F(\mathbf{x}^t) - F(\mathbf{x}^{t-1}) \leq -\frac{\eta \rho_{2k}^- (1 - \eta \rho_{2k}^+)}{2} (F(\mathbf{x}^{t-1}) - F(\bar{\mathbf{x}}))$$

which completes the proof. In the sequel, we prove the inequality (14) by discussing the size of the support set  $S^t \setminus S^{t-1}$ .

First, we consider  $r \geq s$ . Then it is possible that  $|S^t \setminus S^{t-1}| \geq s$ .



**Case 1.**  $|S^t \setminus S^{t-1}| \geq s$ . Using the RSC property, we have

$$\begin{aligned}
& \frac{\rho_{2k}^-}{2} \|\bar{\mathbf{x}} - \mathbf{x}^{t-1}\|^2 \\
& \leq F(\bar{\mathbf{x}}) - F(\mathbf{x}^{t-1}) - \langle \nabla F(\mathbf{x}^{t-1}), \bar{\mathbf{x}} - \mathbf{x}^{t-1} \rangle \\
& \leq F(\bar{\mathbf{x}}) - F(\mathbf{x}^{t-1}) + \frac{\rho_{2k}^-}{2} \|\bar{\mathbf{x}} - \mathbf{x}^{t-1}\|^2 + \frac{1}{2\rho_{2k}^-} \|\nabla_{S \cup S^{t-1}} F(\mathbf{x}^{t-1})\|^2 \\
& = F(\bar{\mathbf{x}}) - F(\mathbf{x}^{t-1}) + \frac{\rho_{2k}^-}{2} \|\bar{\mathbf{x}} - \mathbf{x}^{t-1}\|^2 + \frac{1}{2\rho_{2k}^-} \|\nabla_{S \setminus S^{t-1}} F(\mathbf{x}^{t-1})\|^2.
\end{aligned}$$

Therefore, we get

$$\|\nabla_{S \setminus S^{t-1}} F(\mathbf{x}^{t-1})\|^2 \geq 2\rho_{2k}^- (F(\mathbf{x}^{t-1}) - F(\bar{\mathbf{x}})).$$

Recall that  $S^t \setminus S^{t-1}$  contains the largest elements of  $\mathbf{z}_{S^{t-1}}^t$ . Hence, for any support set  $T \subset \overline{S^{t-1}}$  with  $|T| \leq |S^t \setminus S^{t-1}|$ , we have

$$\|\mathbf{z}_T^t\| \leq \|\mathbf{z}_{S^t \setminus S^{t-1}}^t\|.$$

In particular, we can choose  $T = S \setminus S^{t-1}$  as we assumed that  $|S^t \setminus S^{t-1}| \geq s \geq |T|$ . Then it holds that

$$\|\mathbf{z}_{S^t \setminus S^{t-1}}^t\|^2 \geq \|\mathbf{z}_{S \setminus S^{t-1}}^t\|^2.$$

Note that for the left-hand side,  $\mathbf{z}_{S^t \setminus S^{t-1}}^t = -\eta \nabla_{S^t \setminus S^{t-1}} F(\mathbf{x}^{t-1})$  while for the right-hand side, it is exactly equal to  $-\eta \nabla_{S \setminus S^{t-1}} F(\mathbf{x}^{t-1})$ . This completes the proof of the first case.

**Case 2.**  $|S^t \setminus S^{t-1}| < s \leq r$ . The proof of this part is more involved. We still begin with the RSC property, which gives

$$\begin{aligned}
\frac{\rho_{2k}^-}{2} \|\bar{\mathbf{x}} - \mathbf{x}^{t-1}\|^2 & \leq F(\bar{\mathbf{x}}) - F(\mathbf{x}^{t-1}) - \langle \nabla F(\mathbf{x}^{t-1}), \bar{\mathbf{x}} - \mathbf{x}^{t-1} \rangle \\
& \leq F(\bar{\mathbf{x}}) - F(\mathbf{x}^{t-1}) + \frac{\rho_{2k}^-}{4} \|\bar{\mathbf{x}} - \mathbf{x}^{t-1}\|^2 + \frac{1}{\rho_{2k}^-} \|\nabla_{S \cup S^{t-1}} F(\mathbf{x}^{t-1})\|^2 \\
& = F(\bar{\mathbf{x}}) - F(\mathbf{x}^{t-1}) + \frac{\rho_{2k}^-}{4} \|\bar{\mathbf{x}} - \mathbf{x}^{t-1}\|^2 + \frac{1}{\rho_{2k}^-} \|\nabla_{S \setminus S^{t-1}} F(\mathbf{x}^{t-1})\|^2 \\
& = F(\bar{\mathbf{x}}) - F(\mathbf{x}^{t-1}) + \frac{\rho_{2k}^-}{4} \|\bar{\mathbf{x}} - \mathbf{x}^{t-1}\|^2 + \frac{1}{\rho_{2k}^-} \|\nabla_{S \setminus (S^t \cup S^{t-1})} F(\mathbf{x}^{t-1})\|^2 \\
& \quad + \frac{1}{\rho_{2k}^-} \|\nabla_{(S^t \setminus S^{t-1}) \cap S} F(\mathbf{x}^{t-1})\|^2 \\
& \leq F(\bar{\mathbf{x}}) - F(\mathbf{x}^{t-1}) + \frac{\rho_{2k}^-}{4} \|\bar{\mathbf{x}} - \mathbf{x}^{t-1}\|^2 + \frac{1}{\rho_{2k}^-} \|\nabla_{S \setminus (S^t \cup S^{t-1})} F(\mathbf{x}^{t-1})\|^2 \\
& \quad + \frac{1}{\rho_{2k}^-} \|\nabla_{S^t \setminus S^{t-1}} F(\mathbf{x}^{t-1})\|^2. \tag{15}
\end{aligned}$$

Note that the last term is retained for deduction. What we need to show is a proper bound of the term  $\|\nabla_{S \setminus (S^t \cup S^{t-1})} F(\mathbf{x}^{t-1})\|^2$  above. First, we observe that

$$\mathbf{z}_{S \setminus (S^t \cup S^{t-1})}^t = -\eta \nabla_{S \setminus (S^t \cup S^{t-1})} F(\mathbf{x}^{t-1}).$$

Next, we compare the elements of  $S \setminus (S^t \cup S^{t-1})$  to those in  $(S^t \cap S^{t-1}) \setminus S$ . For convenience, we denote  $T = J^t \setminus (S^{t-1} \cup S^t)$ . Since  $S^t$  contains the  $k$  largest elements of  $\mathbf{z}_{J^t}^t$ , those of  $(S^t \cap S^{t-1}) \setminus S$  are larger than those in  $T$ . On the other hand, recall that elements in  $J^t \setminus S^{t-1}$  are larger than those in  $\overline{J^t}$  due to the partial hard thresholding. Since  $T$  is a subset of  $J^t \setminus S^{t-1}$ , we have that  $T$  is larger

than  $\overline{J^t}$ . Consequently, elements in  $(S^t \cap S^{t-1}) \setminus S$  are larger than those in  $T \cup \overline{J^t} = \overline{S^{t-1} \cup S^t}$ . This suggests that

$$\frac{\left\| \mathbf{z}_{S \setminus (S^t \cup S^{t-1})}^t \right\|^2}{|S \setminus (S^t \cup S^{t-1})|} \leq \frac{\left\| \mathbf{z}_{(S^t \cap S^{t-1}) \setminus S}^t \right\|^2}{|(S^t \cap S^{t-1}) \setminus S|}.$$

Note that  $|S^t \setminus S^{t-1}| < s$  implies  $|(S^t \cap S^{t-1}) \setminus S| \geq k - 2s$ . Therefore,

$$\begin{aligned} \eta^2 \left\| \nabla_{S \setminus (S^t \cup S^{t-1})} F(\mathbf{x}^{t-1}) \right\|^2 &\leq \frac{s}{k - 2s} \left\| \mathbf{x}_{(S^t \cap S^{t-1}) \setminus S}^{t-1} - \eta \nabla_{(S^t \cap S^{t-1}) \setminus S} F(\mathbf{x}^{t-1}) \right\|^2 \\ &= \frac{s}{k - 2s} \left\| \mathbf{x}_{(S^t \cap S^{t-1}) \setminus S}^{t-1} \right\|^2 \\ &= \frac{s}{k - 2s} \left\| (\mathbf{x}^{t-1} - \bar{\mathbf{x}})_{(S^t \cap S^{t-1}) \setminus S} \right\|^2 \\ &\leq \frac{s}{k - 2s} \left\| \mathbf{x}^{t-1} - \bar{\mathbf{x}} \right\|^2. \end{aligned}$$

Plugging the above into (15), we obtain

$$\begin{aligned} \frac{\rho_{2k}^-}{2} \left\| \bar{\mathbf{x}} - \mathbf{x}^{t-1} \right\|^2 &\leq F(\bar{\mathbf{x}}) - F(\mathbf{x}^{t-1}) + \frac{\rho_{2k}^-}{4} \left\| \bar{\mathbf{x}} - \mathbf{x}^{t-1} \right\|^2 + \frac{s}{(k - 2s)\eta^2 \rho_{2k}^-} \left\| \bar{\mathbf{x}} - \mathbf{x}^{t-1} \right\|^2 \\ &\quad + \frac{1}{\rho_{2k}^-} \left\| \nabla_{S^t \setminus S^{t-1}} F(\mathbf{x}^{t-1}) \right\|^2. \end{aligned}$$

Picking  $k \geq 2s + \frac{4s}{\eta^2(\rho_{2k}^-)^2}$  gives

$$\frac{\rho_{2k}^-}{2} \left\| \bar{\mathbf{x}} - \mathbf{x}^{t-1} \right\|^2 \leq F(\bar{\mathbf{x}}) - F(\mathbf{x}^{t-1}) + \frac{\rho_{2k}^-}{2} \left\| \bar{\mathbf{x}} - \mathbf{x}^{t-1} \right\|^2 + \frac{1}{\rho_{2k}^-} \left\| \nabla_{S^t \setminus S^{t-1}} F(\mathbf{x}^{t-1}) \right\|^2,$$

which is exactly the claim (14).

Now we consider the parameter setting  $r < s$ . In this case,  $|S^t \setminus S^{t-1}|$  cannot be greater than  $s$ . In fact, like we have done for Case 2, we can show that

$$\eta^2 \left\| \nabla_{S \setminus (S^t \cup S^{t-1})} F(\mathbf{x}^{t-1}) \right\|^2 \leq \frac{r}{k - r - s} \left\| \mathbf{x}^{t-1} - \bar{\mathbf{x}} \right\|^2.$$

Plugging the above into (15), we obtain

$$\begin{aligned} \frac{\rho_{2k}^-}{2} \left\| \bar{\mathbf{x}} - \mathbf{x}^{t-1} \right\|^2 &\leq F(\bar{\mathbf{x}}) - F(\mathbf{x}^{t-1}) + \frac{\rho_{2k}^-}{4} \left\| \bar{\mathbf{x}} - \mathbf{x}^{t-1} \right\|^2 + \frac{r}{(k - r - s)\eta^2 \rho_{2k}^-} \left\| \bar{\mathbf{x}} - \mathbf{x}^{t-1} \right\|^2 \\ &\quad + \frac{1}{\rho_{2k}^-} \left\| \nabla_{S^t \setminus S^{t-1}} F(\mathbf{x}^{t-1}) \right\|^2. \end{aligned}$$

Using  $k \geq s + r + \frac{4r}{\eta^2(\rho_{2k}^-)^2}$  we prove (14).

Overall, we find that picking  $k \geq s + \left(1 + \frac{4}{\eta^2(\rho_{2k}^-)^2}\right) \min\{r, s\}$  always guarantees the result.  $\square$

**Lemma 16.** Consider the PHT( $r$ ) algorithm. Suppose that  $F(\mathbf{x})$  is  $\rho_{2k}^+$ -RSS. We have

$$F(\mathbf{x}^t) - F(\mathbf{x}^{t-1}) \leq -\frac{1 - \eta\rho_{2k}^+}{2\eta} \left\| \mathbf{z}_{S^t}^t - \mathbf{x}^{t-1} \right\|^2.$$

*Proof.* We partition  $\mathbf{z}^t$  into four disjoint parts:  $S^{t-1} \setminus S^t$ ,  $S^{t-1} \cap S^t$ ,  $S^t \setminus S^{t-1}$  and  $\overline{J^t}$ . It then follows that

$$\begin{aligned} \left\| \mathbf{z}_{S^t}^t - \mathbf{x}^{t-1} \right\|^2 &= \left\| \mathbf{z}_{S^{t-1} \setminus S^t}^t \right\|^2 + \left\| \mathbf{z}_{\overline{J^t}}^t \right\|^2 \\ &\leq \left\| \mathbf{z}_{S^t \setminus S^{t-1}}^t \right\|^2 + \left\| \mathbf{z}_{\overline{J^t}}^t \right\|^2 \\ &= \left\| \mathbf{z}_{S^{t-1}}^t \right\|^2 \\ &= \eta^2 \left\| \nabla F(\mathbf{x}^{t-1}) \right\|^2. \end{aligned}$$

On the other hand, the LHS reads as

$$\begin{aligned}\|\mathbf{z}_{S^t}^t - \mathbf{z}^t\|^2 &= \|\mathbf{z}_{S^t}^t - \mathbf{x}^{t-1} + \eta \nabla F(\mathbf{x}^{t-1})\|^2 \\ &= \|\mathbf{z}_{S^t}^t - \mathbf{x}^{t-1}\|^2 + \eta^2 \|\nabla F(\mathbf{x}^{t-1})\|^2 + 2\eta \langle \nabla F(\mathbf{x}^{t-1}), \mathbf{z}_{S^t}^t - \mathbf{x}^{t-1} \rangle.\end{aligned}$$

Hence,

$$\langle \nabla F(\mathbf{x}^{t-1}), \mathbf{z}_{S^t}^t - \mathbf{x}^{t-1} \rangle \leq -\frac{1}{2\eta} \|\mathbf{z}_{S^t}^t - \mathbf{x}^{t-1}\|^2.$$

Using the RSS property, we have

$$\begin{aligned}F(\mathbf{x}^t) - F(\mathbf{x}^{t-1}) &\leq F(\mathbf{y}^t) - F(\mathbf{x}^{t-1}) \\ &= F(\mathbf{z}_{S^t}^t) - F(\mathbf{x}^{t-1}) \\ &\leq \langle \nabla F(\mathbf{x}^{t-1}), \mathbf{z}_{S^t}^t - \mathbf{x}^{t-1} \rangle + \frac{\rho_{2k}^+}{2} \|\mathbf{z}_{S^t}^t - \mathbf{x}^{t-1}\|^2 \\ &\leq -\frac{1 - \eta\rho_{2k}^+}{2\eta} \|\mathbf{z}_{S^t}^t - \mathbf{x}^{t-1}\|^2.\end{aligned}$$

□

## B Technical Lemmas

**Lemma 17.** Suppose that  $F(\mathbf{x})$  is  $\rho_K^-$ -RSC and  $\rho_K^+$ -RSS for some sparsity level  $K > 0$ . Then for all  $\theta \in \mathbb{R}$ , all vectors  $\mathbf{x}, \mathbf{x}' \in \mathbb{R}^d$  and for any Hessian matrix  $\mathbf{H}$  of  $F(\mathbf{x})$ , we have

$$|\langle \mathbf{x}, (\mathbf{I} - \theta \mathbf{H}) \mathbf{x}' \rangle| \leq \phi_K \|\mathbf{x}\| \cdot \|\mathbf{x}'\|,$$

provided that  $|\text{supp}(\mathbf{x}) \cup \text{supp}(\mathbf{x}')| \leq K$ , and

$$\|((\mathbf{I} - \theta \mathbf{H}) \mathbf{x})_S\| \leq \phi_K \|\mathbf{x}\|, \quad \text{if } |S \cup \text{supp}(\mathbf{x})| \leq K,$$

where

$$\phi_K = \max \{ |\theta \rho_K^- - 1|, |\theta \rho_K^+ - 1| \}.$$

*Proof.* Since  $\mathbf{H}$  is a Hessian matrix, we always have a decomposition  $\mathbf{H} = \mathbf{A}^\top \mathbf{A}$  for some matrix  $\mathbf{A}$ . Denote  $T = \text{supp}(\mathbf{x}) \cup \text{supp}(\mathbf{x}')$ . By simple algebra, we have

$$\begin{aligned}|\langle \mathbf{x}, (\mathbf{I} - \theta \mathbf{H}) \mathbf{x}' \rangle| &= |\langle \mathbf{x}, \mathbf{x}' \rangle - \theta \langle \mathbf{A} \mathbf{x}, \mathbf{A} \mathbf{x}' \rangle| \\ &\stackrel{\zeta_1}{=} |\langle \mathbf{x}, \mathbf{x}' \rangle - \theta \langle \mathbf{A}_T \mathbf{x}, \mathbf{A}_T \mathbf{x}' \rangle| \\ &= \left| \left\langle \mathbf{x}, (\mathbf{I} - \theta \mathbf{A}_T^\top \mathbf{A}_T) \mathbf{x}' \right\rangle \right| \\ &\leq \left\| \mathbf{I} - \theta \mathbf{A}_T^\top \mathbf{A}_T \right\| \cdot \|\mathbf{x}\| \cdot \|\mathbf{x}'\| \\ &\stackrel{\zeta_2}{\leq} \max \{ |\theta \rho_K^- - 1|, |\theta \rho_K^+ - 1| \} \cdot \|\mathbf{x}\| \cdot \|\mathbf{x}'\|.\end{aligned}$$

Here,  $\zeta_1$  follows from the fact that  $\text{supp}(\mathbf{x}) \cup \text{supp}(\mathbf{y}) = T$  and  $\zeta_2$  holds because the RSC and RSS properties imply that the singular values of any Hessian matrix restricted on an  $K$ -sparse support set are lower and upper bounded by  $\rho_K^-$  and  $\rho_K^+$ , respectively.

For some index set  $S$  subject to  $|S \cup \text{supp}(\mathbf{x})| \leq K$ , let  $\mathbf{x}' = ((\mathbf{I} - \theta \mathbf{H}) \mathbf{x})_S$ . We immediately obtain

$$\|\mathbf{x}'\|^2 = \langle \mathbf{x}', (\mathbf{I} - \theta \mathbf{H}) \mathbf{x} \rangle \leq \phi_K \|\mathbf{x}'\| \cdot \|\mathbf{x}\|,$$

indicating

$$\|((\mathbf{I} - \theta \mathbf{H}) \mathbf{x})_S\| \leq \phi_K \|\mathbf{x}\|.$$

□

**Lemma 18.** Suppose that  $F(\mathbf{x})$  is  $\rho_K^-$ -RSC and  $\rho_K^+$ -RSS for some sparsity level  $K > 0$ . For all vectors  $\mathbf{x}, \mathbf{x}' \in \mathbb{R}^d$  and support set  $T$  such that  $|\text{supp}(\mathbf{x} - \mathbf{x}') \cup T| \leq K$ , the following holds for all  $\theta \in \mathbb{R}$ :

$$\|(\mathbf{x} - \mathbf{x}' - \theta \nabla F(\mathbf{x}) + \theta \nabla F(\mathbf{x}'))_T\| \leq \phi_K \|\mathbf{x} - \mathbf{x}'\|,$$

where  $\phi_K$  is given in Lemma 17.

*Proof.* In fact, for any two vectors  $\mathbf{x}$  and  $\mathbf{x}'$ , there always exists a quantity  $t \in [0, 1]$ , such that

$$\nabla F(\mathbf{x}) - \nabla F(\mathbf{x}') = \nabla^2 F(t\mathbf{x} + (1-t)\mathbf{x}')(\mathbf{x} - \mathbf{x}').$$

Let  $\mathbf{H} = \nabla^2 F(t\mathbf{x} + (1-t)\mathbf{x}')$ . We write

$$\begin{aligned} & \|(\mathbf{x} - \mathbf{x}' - \theta \nabla F(\mathbf{x}) + \theta \nabla F(\mathbf{x}'))_T\| \\ &= \|(\mathbf{x} - \mathbf{x}' - \theta \mathbf{H}(\mathbf{x} - \mathbf{x}'))_T\| \\ &= \|((\mathbf{I} - \theta \mathbf{H})(\mathbf{x} - \mathbf{x}'))_T\| \\ &\leq \phi_K \|\mathbf{x} - \mathbf{x}'\|, \end{aligned}$$

where the last inequality applies Lemma 17.  $\square$

**Lemma 19.** Suppose that  $F(\mathbf{x})$  is  $\rho_K^-$ -RSC and  $\rho_K^+$ -RSS for some sparsity level  $K > 0$ . Let  $\kappa := \rho_K^+/\rho_K^-$ . For all vectors  $\mathbf{x}, \mathbf{x}' \in \mathbb{R}^d$  with  $|\text{supp}(\mathbf{x}) \cup \text{supp}(\mathbf{x}')| \leq K$ , we have

$$\begin{aligned} \|\mathbf{x} - \mathbf{x}'\| &\leq \kappa \|\mathbf{x}'_T\| + \frac{1}{\rho_K^-} \|(\nabla F(\mathbf{x}) - \nabla F(\mathbf{x}'))_T\|, \\ \|(\mathbf{x} - \mathbf{x}')_T\| &\leq \left(1 - \frac{1}{\kappa}\right) \|\mathbf{x} - \mathbf{x}'\| + \frac{1}{\rho_K^-} \|(\nabla F(\mathbf{x}) - \nabla F(\mathbf{x}'))_T\|. \end{aligned}$$

where  $T$  is the support set of  $\mathbf{x}$ .

*Proof.* We begin with bounding the  $\ell_2$ -norm of the difference of  $\mathbf{x}$  and  $\mathbf{x}'$ . Let  $\Omega = \text{supp}(\mathbf{x}')$ . For any positive scalar  $\theta \in \mathbb{R}$  we have

$$\begin{aligned} \|(\mathbf{x} - \mathbf{x}')_T\|^2 &= \langle \mathbf{x} - \mathbf{x}' - \theta \nabla F(\mathbf{x}) + \theta \nabla F(\mathbf{x}'), (\mathbf{x} - \mathbf{x}')_T \rangle \\ &\quad + \theta \langle \nabla F(\mathbf{x}) - \nabla F(\mathbf{x}'), (\mathbf{x} - \mathbf{x}')_T \rangle \\ &\leq \|(\mathbf{x} - \mathbf{x}' - \theta \nabla F(\mathbf{x}) + \theta \nabla F(\mathbf{x}'))_T\| \cdot \|(\mathbf{x} - \mathbf{x}')_T\| \\ &\quad + \theta \|(\nabla F(\mathbf{x}) - \nabla F(\mathbf{x}'))_T\| \cdot \|(\mathbf{x} - \mathbf{x}')_T\| \\ &\leq \|\mathbf{x} - \mathbf{x}' - \theta(\nabla F(\mathbf{x}))_{T \cup \Omega} + \theta(\nabla F(\mathbf{x}'))_{T \cup \Omega}\| \cdot \|(\mathbf{x} - \mathbf{x}')_T\| \\ &\quad + \theta \|(\nabla F(\mathbf{x}) - \nabla F(\mathbf{x}'))_T\| \cdot \|(\mathbf{x} - \mathbf{x}')_T\| \\ &\leq \phi_K \|\mathbf{x} - \mathbf{x}'\| \cdot \|(\mathbf{x} - \mathbf{x}')_T\| + \theta \|(\nabla F(\mathbf{x}) - \nabla F(\mathbf{x}'))_T\| \cdot \|(\mathbf{x} - \mathbf{x}')_T\|, \end{aligned}$$

where we recall that  $\phi_K$  is given in Lemma 17. Dividing both sides by  $\|(\mathbf{x} - \mathbf{x}')_T\|$  gives

$$\|(\mathbf{x} - \mathbf{x}')_T\| \leq \phi_K \|\mathbf{x} - \mathbf{x}'\| + \theta \|(\nabla F(\mathbf{x}) - \nabla F(\mathbf{x}'))_T\|.$$

On the other hand,

$$\begin{aligned} \|\mathbf{x} - \mathbf{x}'\| &\leq \|(\mathbf{x} - \mathbf{x}')_T\| + \|(\mathbf{x} - \mathbf{x}')_{\bar{T}}\| \\ &\leq \phi_K \|\mathbf{x} - \mathbf{x}'\| + \theta \|(\nabla F(\mathbf{x}) - \nabla F(\mathbf{x}'))_T\| + \|\mathbf{x}'_{\bar{T}}\|. \end{aligned}$$

Hence, we have

$$\|\mathbf{x} - \mathbf{x}'\| \leq \frac{1}{1 - \phi_K} \|\mathbf{x}'_{\bar{T}}\| + \frac{\theta}{1 - \phi_K} \|(\nabla F(\mathbf{x}) - \nabla F(\mathbf{x}'))_T\|.$$

Picking  $\theta = 1/\rho_K^+$ , we have  $\phi_K = 1 - \frac{1}{\kappa}$ . Plugging these into the above and noting that  $\rho_K^+ \geq \rho_K^-$  complete the proof.  $\square$

**Lemma 20.** Suppose that  $F(\mathbf{x})$  is  $\rho_K^-$ -RSC. Then for any vectors  $\mathbf{x}$  and  $\mathbf{x}'$  with  $\|\mathbf{x} - \mathbf{x}'\|_0 \leq K$ , the following holds:

$$\|\mathbf{x} - \mathbf{x}'\| \leq \sqrt{\frac{2 \max\{F(\mathbf{x}) - F(\mathbf{x}'), 0\}}{\rho_K^-}} + \frac{2 \|(\nabla F(\mathbf{x}'))_T\|}{\rho_K^-},$$

where  $T = \text{supp}(\mathbf{x} - \mathbf{x}')$ .

*Proof.* The RSC property immediately implies

$$\begin{aligned} F(\mathbf{x}) - F(\mathbf{x}') &\geq \langle \nabla F(\mathbf{x}'), \mathbf{x} - \mathbf{x}' \rangle + \frac{\rho_K^-}{2} \|\mathbf{x} - \mathbf{x}'\|^2 \\ &\geq -\|\nabla_T F(\mathbf{x}')\| \cdot \|\mathbf{x} - \mathbf{x}'\| + \frac{\rho_K^-}{2} \|\mathbf{x} - \mathbf{x}'\|^2. \end{aligned}$$

Discussing the sign of  $F(\mathbf{x}) - F(\mathbf{x}')$  and solving the above quadratic inequality completes the proof.  $\square$

**Proposition 21.** Suppose that  $F(\mathbf{x})$  is  $\rho_{k+s}^-$ -RSC and  $\rho_{2k}^+$ -RSS. Let  $\kappa := \rho_{2k}^+ / \rho_{k+s}^-$ . Suppose that for all  $t \geq 1$ ,  $\mathbf{x}^t$  is  $k$ -sparse and the following holds:

$$F(\mathbf{x}^t) - F(\bar{\mathbf{x}}) \leq \mu_t (F(\mathbf{x}^{t-1}) - F(\bar{\mathbf{x}})) + \tau,$$

where  $0 < \mu_t < \mu < 1$  for some  $\mu, \tau \geq 0$  and  $\bar{\mathbf{x}}$  is an arbitrary  $s$ -sparse signal. Then,

$$\|\mathbf{x}^t - \bar{\mathbf{x}}\| \leq \sqrt{2\kappa}(\sqrt{\mu_1 \mu_2 \dots \mu_t}) \|\mathbf{x}^0 - \bar{\mathbf{x}}\| + \frac{3}{\rho_{k+s}^-} \|\nabla_{k+s} F(\bar{\mathbf{x}})\| + \sqrt{\frac{2\tau}{\rho_{k+s}^- (1 - \mu)}}.$$

*Proof.* The RSS property implies that

$$\begin{aligned} F(\mathbf{x}^0) - F(\bar{\mathbf{x}}) &\leq \langle \nabla F(\bar{\mathbf{x}}), \mathbf{x}^0 - \bar{\mathbf{x}} \rangle + \frac{\rho_{2k}^+}{2} \|\mathbf{x}^0 - \bar{\mathbf{x}}\|^2 \\ &\leq \frac{\rho_{2k}^+}{2} \|\mathbf{x}^0 - \bar{\mathbf{x}}\|^2 + \frac{1}{2\rho_{2k}^+} \|\nabla_{k+s} F(\bar{\mathbf{x}})\|^2 + \frac{\rho_{2k}^+}{2} \|\mathbf{x}^0 - \bar{\mathbf{x}}\|^2 \\ &\leq \rho_{2k}^+ \|\mathbf{x}^0 - \bar{\mathbf{x}}\|^2 + \frac{1}{2\rho_{2k}^+} \|\nabla_{k+s} F(\bar{\mathbf{x}})\|^2. \end{aligned}$$

Denote  $\mu_{1:t} = \mu_1 \mu_2 \dots \mu_t$ . We obtain

$$F(\mathbf{x}^t) - F(\bar{\mathbf{x}}) \leq \mu_{1:t} \rho^+ \|\mathbf{x}^0 - \bar{\mathbf{x}}\|^2 + \frac{1}{2\rho_{2k}^+} \|\nabla_{k+s} F(\bar{\mathbf{x}})\|^2 + \frac{\tau}{1 - \mu}.$$

By Lemma 20, we have

$$\begin{aligned} &\|\mathbf{x}^t - \bar{\mathbf{x}}\| \\ &\leq \sqrt{\frac{2}{\rho_{k+s}^-}} \sqrt{\mu_{1:t} \rho_{2k}^+ \|\mathbf{x}^0 - \bar{\mathbf{x}}\|^2 + \frac{1}{2\rho_{2k}^+} \|\nabla_{k+s} F(\bar{\mathbf{x}})\|^2 + \frac{\tau}{1 - \mu}} + \frac{2}{\rho_{k+s}^-} \|\nabla_{k+s} F(\bar{\mathbf{x}})\| \\ &\leq \sqrt{2\kappa}(\sqrt{\mu_{1:t}}) \|\mathbf{x}^0 - \bar{\mathbf{x}}\| + \sqrt{\frac{1}{\rho_{k+s}^- \rho_{2k}^+}} \|\nabla_{k+s} F(\bar{\mathbf{x}})\| + \frac{2}{\rho_{k+s}^-} \|\nabla_{k+s} F(\bar{\mathbf{x}})\| + \sqrt{\frac{2\tau}{\rho_{k+s}^- (1 - \mu)}} \\ &\leq \sqrt{2\kappa}(\sqrt{\mu_{1:t}}) \|\mathbf{x}^0 - \bar{\mathbf{x}}\| + \frac{3}{\rho_{k+s}^-} \|\nabla_{k+s} F(\bar{\mathbf{x}})\| + \sqrt{\frac{2\tau}{\rho_{k+s}^- (1 - \mu)}}. \end{aligned}$$

$\square$
